# Supplementary material
Source: PubMed Central journal article supplement (PMC2648088)
Supplement: tpc.108.060137_1.pdf [file tpc.108.060137_1.pdf]

|          |   |   |   |   |
|----------|---|---|---|---|
| template | b | b | c | c |
| primer   | b | c | b | c |



**Specific amplification of *miR398b* and *miR398c*.** The genomic region of *miR398b* and *miR398c* was amplified by using specific primer sets, *miR398b*-FW and *miR398b*-RV for *miR398b* (b), and *miR398c*-FW and *miR398c*-RV for *miR398c* (c). Diluted PCR products were used as template and were amplified by specific primers *miR398b*-dtF and *miR398b*-dtR for *miR398b* (b), and *miR398c*-dtF and *miR398c*-dtR for *miR398c* (c) The annealing temperature was 65 °C the primer sequences are described in Supplemental table 5.

## Supplemental Figure 1

**A**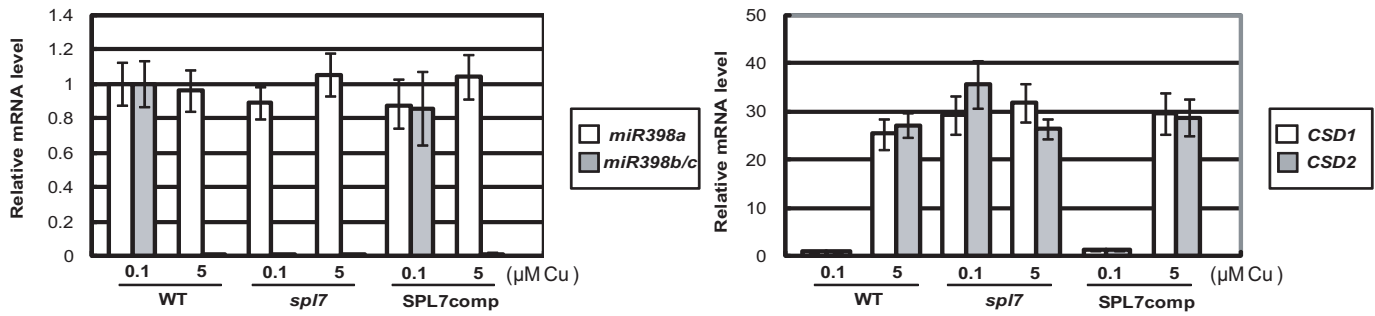**B**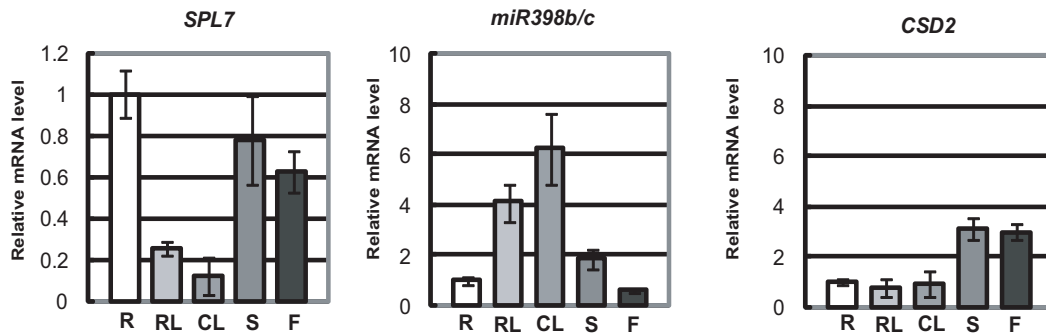**C**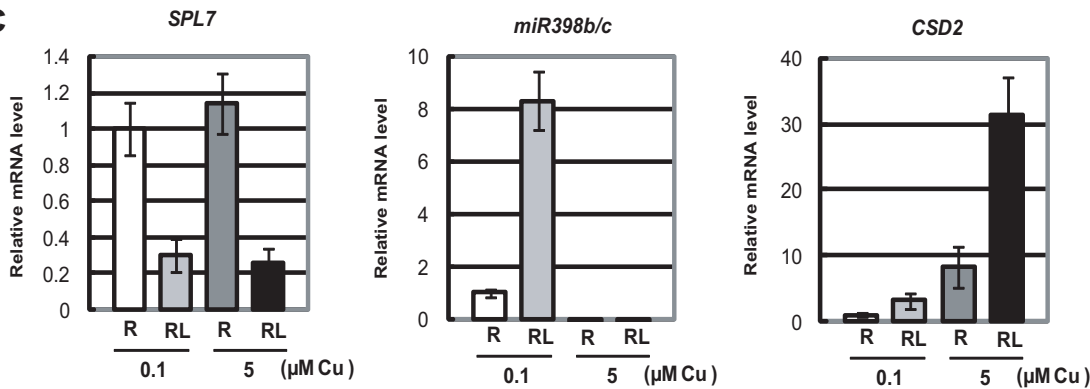**D**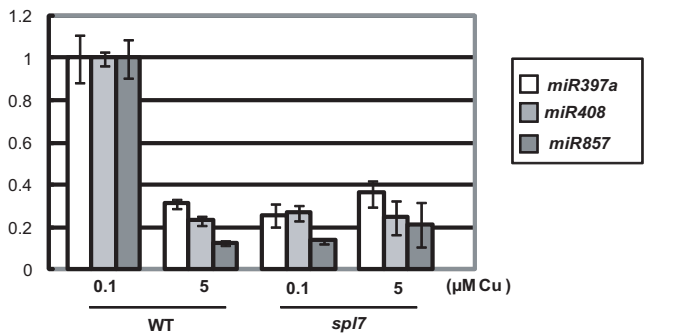

**Quantification of gene expression by real-time PCR. (A)** Relative mRNA level of *miR398a*, *miR398b/c*, *CSD1* and *CSD2*. The plant growth conditions were the same as Figure 4A. **(B,C)** Relative mRNA level of *SPL7*, *miR398b/c* and *CSD2*. Plant growth conditions were the same as Figure 6A (B) and Figure 6B (C). **(D)** Relative mRNA level of *miR397a*, *miR408* and *miR857*. The plant growth conditions were the same as Figure 7A.

## Supplemental Figure 2

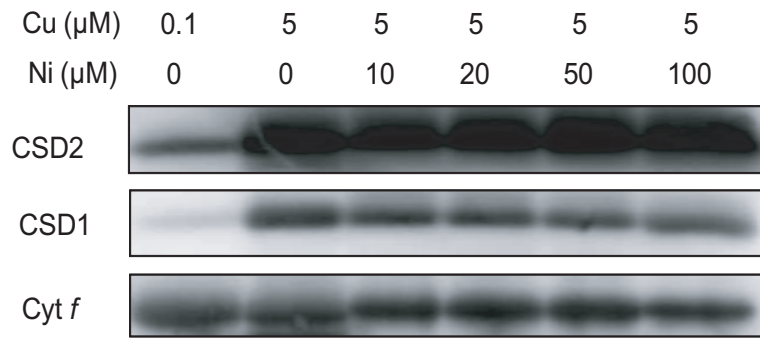

**Excess nickel does not disturb copper regulation under copper sufficiency.**

Immunoblot analysis of CSDs and *Cyt f* in the seedlings grown for 3 weeks on MS media containing indicated concentrations of copper and nickel. *Cyt f* is shown as a loading control.

## Supplemental Figure 3

**A**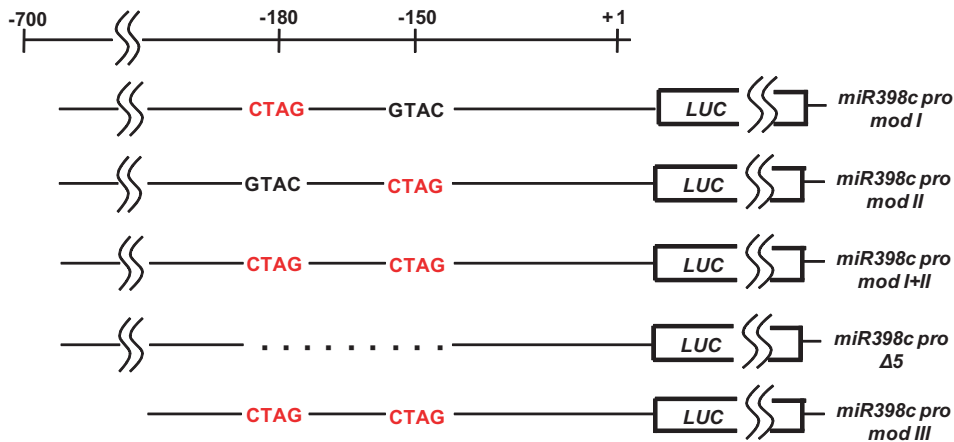**B**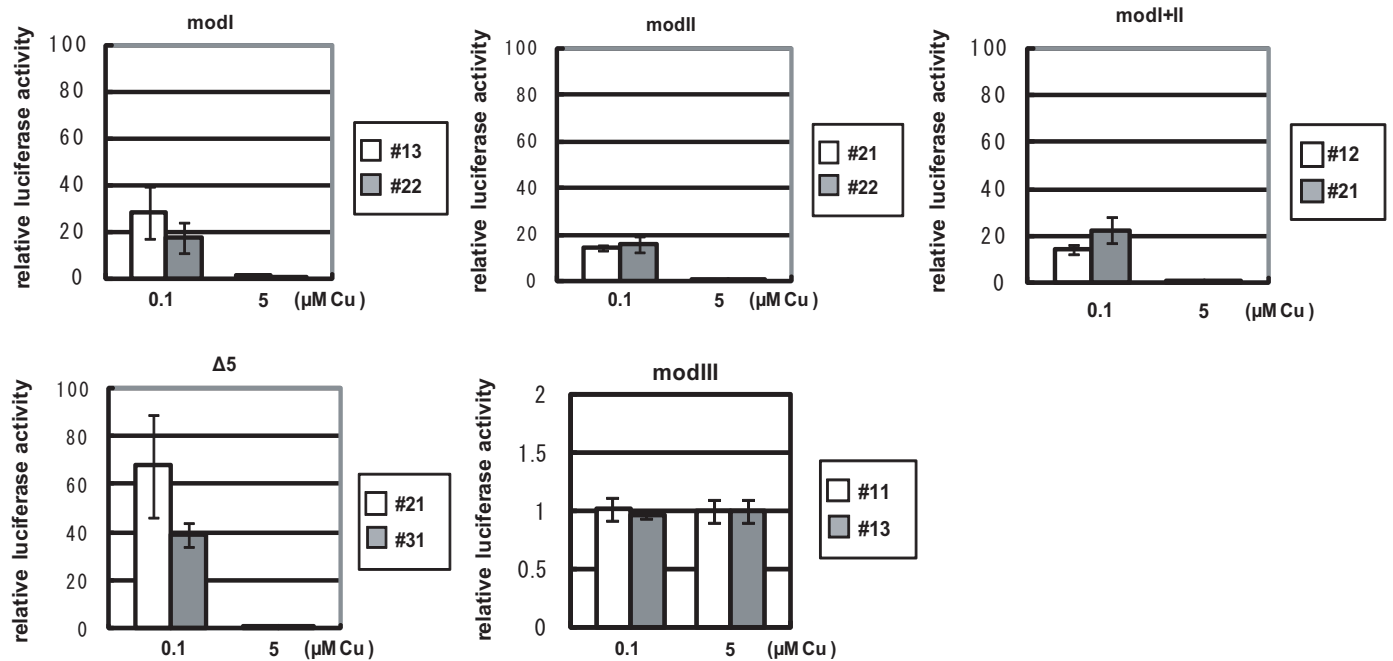

**Identification of cis-elements in the promoter region of *miR398c*.** (A) Construction of mutant versions of *miR398c pro* :: *LUC*. Red characters indicate base substitutions and a dotted line indicates a truncated region. (B) Relative luciferase activity in 2-week-old seedlings of transgenic lines. Each graph shows relative levels of luminescence in two independent transgenic lines. Data are average of four independent seedlings with standard deviations. The scales of the y-axes differ among panels.

## Supplemental Figure 4

## Supplemental Table 1

Microarray data for genes detected in RT-PCR. The results shown are the means  $\pm$ SD of three biological replicates.

| Gene name | AGI code  | fold change<br>WT Cu0.1/<br><i>sp17</i> Cu 0.1 | signal           |                  | intensity          |                  |
|-----------|-----------|------------------------------------------------|------------------|------------------|--------------------|------------------|
|           |           |                                                | WT Cu 0.1        | WT Cu 5          | <i>sp17</i> Cu 0.1 | <i>sp17</i> Cu 5 |
| COPT1     | At5g59030 | 3.01                                           | 7380 $\pm$ 290   | 2150 $\pm$ 70    | 2450 $\pm$ 70      | 2960 $\pm$ 50    |
| COPT2     | At3g46900 | 4.36                                           | 4190 $\pm$ 500   | 1310 $\pm$ 160   | 961 $\pm$ 25       | 1150 $\pm$ 80    |
| ZIP2      | At5g59520 | 7.23                                           | 410 $\pm$ 30     | 64.7 $\pm$ 20.3  | 56.7 $\pm$ 3.0     | 50.0 $\pm$ 2.4   |
| ZIP4      | At1g10970 | 0.945                                          | 811 $\pm$ 169    | 744 $\pm$ 60     | 858 $\pm$ 66       | 620 $\pm$ 24     |
| FRO3      | At1g23020 | 2.61                                           | 8530 $\pm$ 560   | 3210 $\pm$ 120   | 3260 $\pm$ 100     | 5400 $\pm$ 250   |
| CCH       | At3g56240 | 4.53                                           | 49300 $\pm$ 4000 | 10100 $\pm$ 1100 | 10900 $\pm$ 1100   | 8320 $\pm$ 530   |
| ATX1      | At1g66240 | 0.914                                          | 19700 $\pm$ 2300 | 15400 $\pm$ 2600 | 21500 $\pm$ 1600   | 13400 $\pm$ 700  |

## Supplemental Table 2

A list of genes up-regulated more than 20 times under copper deficiency in the wild-type.

The results shown are the means  $\pm$ SD of three biological replicates.

|    | Gene name                          | AGI code  | fold change<br>WT Cu0.1/<br><i>sp17</i> Cu 0.1 | WT Cu 0.1         | WT Cu 5         | <i>sp17</i> Cu 0.1 | <i>sp17</i> Cu 5 |
|----|------------------------------------|-----------|------------------------------------------------|-------------------|-----------------|--------------------|------------------|
| 1  | FSD1                               | At4g25100 | 24000                                          | 68100 $\pm$ 10300 | 136 $\pm$ 40    | 2.83 $\pm$ 0.89    | 3.53 $\pm$ 1.09  |
| 2  | bHLH protein                       | At1g71200 | 277                                            | 686 $\pm$ 94      | 2.51 $\pm$ 0.44 | 2.47 $\pm$ 0.27    | 2.40 $\pm$ 0.41  |
| 3  | hypothetical protein               | At1g33840 | 55.6                                           | 211 $\pm$ 35      | 2.74 $\pm$ 0.25 | 3.79 $\pm$ 0.14    | 2.63 $\pm$ 0.26  |
| 4  | unknown protein                    | At1g14880 | 54.3                                           | 828 $\pm$ 103     | 12.6 $\pm$ 4.9  | 15.2 $\pm$ 3.0     | 21.7 $\pm$ 2.2   |
| 5  | TAT3                               | At2g24850 | 39.9                                           | 2910 $\pm$ 370    | 36.2 $\pm$ 4.8  | 73.0 $\pm$ 3.4     | 42.4 $\pm$ 4.1   |
| 6  | AAA-type ATPase family protein     | At3g28510 | 38.6                                           | 319 $\pm$ 29      | 18.1 $\pm$ 1.2  | 8.26 $\pm$ 4.95    | 6.09 $\pm$ 2.89  |
| 7  | unknown protein                    | At4g21840 | 38.1                                           | 516 $\pm$ 46      | 19.9 $\pm$ 4.3  | 13.5 $\pm$ 3.5     | 16.6 $\pm$ 2.6   |
| 8  | expressed protein                  | At3g48640 | 35.5                                           | 109 $\pm$ 21      | 25.0 $\pm$ 3.5  | 3.08 $\pm$ 0.72    | 4.44 $\pm$ 2.95  |
| 9  | WRKY type transcription factor     | At5g22570 | 33.4                                           | 186 $\pm$ 25      | 5.57 $\pm$ 2.79 | 5.57 $\pm$ 1.72    | 9.55 $\pm$ 1.06  |
| 10 | cytochrome P450 family protein     | At3g25180 | 26.9                                           | 258 $\pm$ 65      | 11.8 $\pm$ 1.9  | 9.62 $\pm$ 2.34    | 11.2 $\pm$ 2.1   |
| 11 | lyase                              | At1g61120 | 25.7                                           | 470 $\pm$ 106     | 24.2 $\pm$ 10.8 | 18.2 $\pm$ 7.0     | 3.86 $\pm$ 1.72  |
| 12 | unknown protein                    | At5g52720 | 25.4                                           | 58.2 $\pm$ 11.1   | 3.75 $\pm$ 2.64 | 2.28 $\pm$ 0.32    | 3.16 $\pm$ 1.93  |
| 13 | glycosyl hydrolase family 17       | At3g57260 | 24.4                                           | 4990 $\pm$ 560    | 413 $\pm$ 41    | 203 $\pm$ 7        | 273 $\pm$ 40     |
| 14 | oxidoreductase                     | At4g10500 | 23.8                                           | 392 $\pm$ 47      | 20.6 $\pm$ 3.5  | 16.4 $\pm$ 1.4     | 18.8 $\pm$ 4.9   |
| 15 | leucine-rich repeat family protein | At3g24954 | 22.5                                           | 503 $\pm$ 51      | 17.7 $\pm$ 4.4  | 22.3 $\pm$ 1.5     | 12.8 $\pm$ 5.3   |
| 16 | wall-associated kinase             | At1g21240 | 21.7                                           | 71.9 $\pm$ 26.7   | 8.94 $\pm$ 5.68 | 3.31 $\pm$ 0.78    | 3.31 $\pm$ 0.64  |
| 17 | mannitol dehydrogenase             | At4g37990 | 21                                             | 373 $\pm$ 63      | 21.4 $\pm$ 1.0  | 17.7 $\pm$ 2.5     | 13.8 $\pm$ 1.1   |
| 18 | expressed protein                  | At2g44240 | 20.2                                           | 169 $\pm$ 44      | 14.0 $\pm$ 5.7  | 8.37 $\pm$ 0.93    | 7.47 $\pm$ 1.77  |
| 19 | glutaredoxin family protein        | At1g28480 | 20                                             | 771 $\pm$ 98      | 55.9 $\pm$ 1.8  | 38.6 $\pm$ 2.9     | 71.4 $\pm$ 5.0   |

## Supplemental Table 3

A list of genes down-regulated under copper deficiency to less than 5 percent of normal transcript levels in the wild-type compared to *sp17*. The results shown are the means  $\pm$ SD of three biological replicates.

|    | Gene name                       | AGI code  | fold change<br>WT Cu0.1/<br><i>sp17</i> Cu 0.1 | signal          |                   | intensity          |                   |
|----|---------------------------------|-----------|------------------------------------------------|-----------------|-------------------|--------------------|-------------------|
|    |                                 |           |                                                | WT Cu 0.1       | WT Cu 5           | <i>sp17</i> Cu 0.1 | <i>sp17</i> Cu 5  |
| 1  | LEA protein                     | At1g52690 | 0.006                                          | 163 $\pm$ 34    | 774 $\pm$ 17      | 26100 $\pm$ 1200   | 238 $\pm$ 34      |
| 2  | alternative NADH-dehydrogenase  | At2g20800 | 0.01                                           | 4.25 $\pm$ 2.40 | 11.2 $\pm$ 3.3    | 417 $\pm$ 22       | 9.71 $\pm$ 2.01   |
| 3  | glycosyl hydrolase family 38    | At5g66150 | 0.01                                           | 2.53 $\pm$ 0.18 | 3.77 $\pm$ 1.91   | 250 $\pm$ 34       | 55.2 $\pm$ 5.6    |
| 4  | LEA domain-containing protein   | At3g17520 | 0.013                                          | 76.8 $\pm$ 20.2 | 139 $\pm$ 14      | 5720 $\pm$ 350     | 114 $\pm$ 13      |
| 5  | MutT/nudix family               | At5g19470 | 0.017                                          | 11.3 $\pm$ 0.9  | 5.46 $\pm$ 2.80   | 643 $\pm$ 48       | 7.94 $\pm$ 2.86   |
| 6  | lipid transfer protein 3        | At5g59320 | 0.017                                          | 23.3 $\pm$ 2.0  | 49.3 $\pm$ 5.7    | 1360 $\pm$ 240     | 80.5 $\pm$ 16.8   |
| 7  | expressed protein               | At4g12735 | 0.02                                           | 3.19 $\pm$ 0.79 | 6.35 $\pm$ 3.11   | 1580 $\pm$ 10      | 2.47 $\pm$ 0.12   |
| 8  | expressed protein               | At5g54550 | 0.021                                          | 5.47 $\pm$ 2.53 | 4.16 $\pm$ 1.45   | 259 $\pm$ 18       | 8.77 $\pm$ 1.00   |
| 9  | LEA domain-containing protein   | At5g44310 | 0.024                                          | 3.68 $\pm$ 1.17 | 12.2 $\pm$ 2.6    | 148 $\pm$ 51       | 11.0 $\pm$ 1.2    |
| 10 | CSD2                            | At2g28190 | 0.027                                          | 2480 $\pm$ 700  | 108000 $\pm$ 9000 | 88700 $\pm$ 9700   | 104000 $\pm$ 6000 |
| 11 | CSD1                            | At1g08830 | 0.031                                          | 1500 $\pm$ 100  | 43800 $\pm$ 3200  | 47200 $\pm$ 1600   | 41500 $\pm$ 5100  |
| 12 | peroxiredoxin                   | At1g48130 | 0.035                                          | 2.91 $\pm$ 0.76 | 3.64 $\pm$ 2.65   | 81.4 $\pm$ 2.0     | 39.5 $\pm$ 7.6    |
| 13 | AAA-type ATPase family protein  | At2g18193 | 0.038                                          | 79.5 $\pm$ 19.2 | 189 $\pm$ 4       | 2060 $\pm$ 370     | 82.8 $\pm$ 3.8    |
| 14 | transferase family protein      | At1g65450 | 0.038                                          | 47.4 $\pm$ 8.5  | 19.0 $\pm$ 3.2    | 1240 $\pm$ 90      | 602 $\pm$ 57      |
| 15 | expressed protein               | At3g12960 | 0.038                                          | 4.28 $\pm$ 1.51 | 8.69 $\pm$ 1.12   | 111 $\pm$ 29       | 5.40 $\pm$ 1.75   |
| 16 | Plantacyanin                    | At2g02850 | 0.043                                          | 57.8 $\pm$ 7.6  | 625 $\pm$ 19      | 1340 $\pm$ 110     | 680 $\pm$ 116     |
| 17 | heat shock transcription factor | At5g43840 | 0.045                                          | 205 $\pm$ 104   | 407 $\pm$ 203     | 4560 $\pm$ 870     | 262 $\pm$ 64      |
| 32 | CCS                             | At1g12520 | 0.14                                           | 6540 $\pm$ 100  | 59900 $\pm$ 3700  | 46500 $\pm$ 4600   | 49600 $\pm$ 3500  |

## Supplemental Table 4

The primer sequences used for plasmid construction. The underline indicates the base substitution.

| Name                        | Sequence                                      |
|-----------------------------|-----------------------------------------------|
| <i>miR398c</i> pro-F        | 5'-GGCGT <u>AGATC</u> ICAAGGGAGAGTAATTAC-3'   |
| <i>miR398c</i> pro-R        | 5'-GTCCTTTTAT <u>CCATGG</u> TTTAGAAGATAG-3'   |
| <i>miR398c</i> pro-F1       | 5'-GAGGAGATCITTGGAACACTTCC-3'                 |
| <i>miR398c</i> pro-F2       | 5'-TGT <u>AGATC</u> IGTTTCGCAGTACAC-3'        |
| <i>miR398c</i> pro-F3       | 5'-AATGCAAC <u>AGATC</u> ITTGGCCCGTTTG-3'     |
| <i>miR398c</i> pro-F4       | 5'-CACAATCCTTTCATCATT <u>AGATC</u> IGTTGTG-3' |
| <i>miR398c</i> modI-R       | 5'-CAGTTTCGCAC <u>ATG</u> ACAATTCTG-3'        |
| <i>miR398c</i> modI-F       | 5'-TTCGCAC <u>ATG</u> ACAATTCTGTAGG-3'        |
| <i>miR398c</i> modII-R      | 5'-GGTTTTTTTTATT <u>CATG</u> TAAAGAA-3'       |
| <i>miR398c</i> modII-F      | 5'-TTTTATT <u>CATG</u> TAAAGAAAACG-3'         |
| pBI121-F                    | 5'-TATAGTCCT <u>CTCG</u> AGTTTCGC-3'          |
| pBI121-R                    | 5'-CGTTATCCCC <u>AGATC</u> ITGTGG-3'          |
| <i>miR398c</i> proHindIII-F | 5'-ATGTTGATTTTTTTGTAAATA <u>AAGCT</u> TCGC-3' |
| <i>miR398c</i> pro Sall-R   | 5'-GAAAACGTCGACGAATGCAACAAATCG-3'             |



# Supplemental Table 5

The primer sequences used for RT-PCR analysis.

| Name                | Sequence                       | Name        | Sequence                         |
|---------------------|--------------------------------|-------------|----------------------------------|
| <i>miR397a</i> -F   | 5'-GAATGAACATCATTGAGTGACAG-3'  | CCH-F       | 5'-GTTGGTATGTCATGCCAAGGC-3'      |
| <i>miR397a</i> -R   | 5'-GCGTTGCGCTCAATTATGTTT-3'    | CCH-R       | 5'-GCTGATGTTGAACCAAAGCC-3'       |
| <i>miR398b</i> -FW  | 5'-TGGGGACTAGGGACCATAGAG-3'    | ATX1-F      | 5'-TCTTTCAAGCCTTGTCGGTGG-3'      |
| <i>miR398b</i> -RV  | 5'-GAACTTCCTGGCGAAGAGGAA-3'    | ATX1-R      | 5'-GAAGCTGAAGGTGAAACTGCT-3'      |
| <i>miR398c</i> -FW  | 5'-AGAAAGAAATAGAGGTGCTGG-3'    | SPL7-F (A)  | 5'-TTGAAGACTCTCAGATGTCTTCTCTG-3' |
| <i>miR398c</i> -RV  | 5'-GATGAAGGATCTACTTTAATTTTC-3' | SPL7-R (A)  | 5'-CTTCCGAAGAAGAAACGGGT-3'       |
| <i>miR398b</i> -dtF | 5'-CGAGTAATCAACGGCTGTAAT-3'    | SPL7-F (B)  | 5'-AGCTCTACGATTGGAATCCAG-3'      |
| <i>miR398c</i> -dtF | 5'-CGAGCAATCAACGGCTATAAC-3'    | SPL7-R (B)  | 5'-GGACAAAACCTTCTGCAACCTAAAT-3'  |
| <i>miR408</i> -F    | 5'-AAGCGGTAATGAGAGAGAGAC-3'    | FSD1-F      | 5'-CAAACCTCTGGAGTTTCACTG-3'      |
| <i>miR408</i> -R    | 5'-GGAATTTTATTGCTACTGCTAAC-3'  | FSD1-R      | 5'-GCTGTAAGTGCCAGACTTGA-3'       |
| <i>miR857</i> -F    | 5'-CGACTCCTACAACAACTTTC-3'     | YSL2-F      | 5'-GTACCTCTTCGAAAGGTGATG-3'      |
| <i>miR857</i> -R    | 5'-CGTCGAGCATTTGAATTTCTAGA-3'  | YSL2-R      | 5'-GCACTGATCTTAGGAGATGGG-3'      |
| COPT1-F             | 5'-TGATCACATGCATGGAATGCC-3'    | bHLH-F      | 5'-TGTCTTCTCAACCGAATCATC-3'      |
| COPT1-R             | 5'-GAATACCTCCGATGACCGGAA-3'    | bHLH-R      | 5'-GGTCCTTCTATTTCGAGCAATC-3'     |
| COPT2-F             | 5'-TGATCACATGCATGACATGCC-3'    | TAT3-F      | 5'-AACCAAGCCATAGAGATCGTG-3'      |
| COPT2-R             | 5'-CTTTCTCTTTGGGAGCACTAC-3'    | TAT3-R      | 5'-GGGGAAGTTTGCATCAATAGC-3'      |
| ZIP2-F              | 5'-TTCCTCTGTTTCTCCTTGATC-3'    | At1g14880-F | 5'-TCATGCTCAAGGAGAATGGTC-3'      |
| ZIP2-R              | 5'-CATGTTAGCAGCCGCTGGATA-3'    | At1g14880-R | 5'-CAGGGAACGCAGAGAAACAAC-3'      |
| ZIP4-F              | 5'-GACAATGGCTTCTTCTACCAC-3'    | At4g21840-F | 5'-TGCAGTTCATCAAGTGGATC-3'       |
| ZIP4-R              | 5'-GTTCTTTGCAATGGTTGCTGC-3'    | At4g21840-R | 5'-CTCTACTCCAACCGATCAACG-3'      |
| FRO3-F              | 5'-CAAGGCTGGATTCAATAGCAG-3'    | CCS-F       | 5'-ATTCTCAGGTCAGTGGCAACG-3'      |
| FRO3-R              | 5'-GCTCTTCTTTGTCTTCCACGT-3'    | CCS-R       | 5'-GGTACTGTCATATGGGAAGCT-3'      |

## Supplemental Table 6

The primer sequences used for quantitative RT-PCR analysis.

| Name                | Sequence                       |
|---------------------|--------------------------------|
| <i>miR398a</i> q-F  | 5'-TCAAAGGAGTGGCATGTGAACAC-3'  |
| <i>miR398a</i> q-R  | 5'-GTTCTCAGGTCACCCCTTTGAATC-3' |
| <i>miR398bc</i> q-F | 5'-GGATCTCGACAGGGTTGATATG-3'   |
| <i>miR398bc</i> q-R | 5'-CAGGTCACCCCTGCTGAGCTCTT-3'  |
| CSD1 q-F            | 5'-TTCTGGCCTTAAGCCTGGTC-3'     |
| CSD1 q-R            | 5'-CGACATGCTGGTGATCTAGG-3'     |
| CSD2 q-F            | 5'-CATGACACACGGAGCTCCAG-3'     |
| CSD2 q-R            | 5'-GGATGACCTCGGAAAGGGTG-3'     |
| SPL7 q-F            | 5'-GAGCTGGAGGGCTATATCCG-3'     |
| SPL7 q-R            | 5'-GGAAGAGGCTCGATGACTGT-3'     |
| <i>miR397a</i> -F   | 5'-GAATGAACATCATTGAGTGACAG-3'  |
| <i>miR397a</i> -R   | 5'-GCGTTGCGCTCAATTATGTTT-3'    |
| <i>miR408</i> q-F   | 5'-CAGGGAACAAGCAGAGCATG-3'     |
| <i>miR408</i> -R    | 5'-GGAATTTTATTGCTACTGCTAAC-3'  |
| <i>miR857</i> q-F   | 5'-CGACTCCTACAACAACTTTC-3'     |
| <i>miR857</i> -R    | 5'-CGTCGAGCATTGGAATTTCTAGA-3'  |
